# Supplementary material
Source: publisher figshare collection journal article supplement (https://gsajournals.figshare.com/ndownloader/files/13477052)
Supplement: Supplementary file 1 [file 13477052]

## Sheet: YR_overlap_with_otherGWAS_loci_
Table S5. Overlap of identified GWAS signals with SNPs previusly shown to be associated with resistance to wheat stripe rust.
Chromosome Arm	Phenotype	90K consensus map (left)	90K consensus map (right)	Known_marker	Contig	Named loci	Reference
1bl	IT	90	115	wsnp_Ex_c27176_36393952	3919002_1bl		Daetwyler et al. (2014). Genomic prediction for rust resistance in diverse wheat landraces. TAG. Theoretical and Applied Genetics. 127(8), 1795–1803.
2bl	IT	97	157	wsnp_Ex_c16425_24923685	7991007_2bl	Yr5,Yr7 region	Zurn et. Al. (2014). High-density mapping of a resistance gene to Ug99 from the Iranian landrace PI 626573. Molecular Breeding, 34(3), 871–881.
2bl	IT	108	119	wsnp_Ex_c16425_24923837	7991007_2bl	Yr5,Yr7 region	Zurn et. Al. (2014). High-density mapping of a resistance gene to Ug99 from the Iranian landrace PI 626573. Molecular Breeding, 34(3), 871–881.
2bl	IT	108	119	wsnp_BG274584B_Ta_2_1	8041793_2bl	Yr5,Yr7 region	Zurn et. Al. (2014). High-density mapping of a resistance gene to Ug99 from the Iranian landrace PI 626573. Molecular Breeding, 34(3), 871–881.
2bl	IT	108	119	wsnp_Ex_rep_c67561_66189356	7961027_2bl	Yr5,Yr7 region	Zurn et. Al. (2014). High-density mapping of a resistance gene to Ug99 from the Iranian landrace PI 626573. Molecular Breeding, 34(3), 871–881.
2bl	IT	108	119	wsnp_RFL_Contig3522_3685860	8054671_2bl	Yr5,Yr7 region	Zurn et. Al. (2014). High-density mapping of a resistance gene to Ug99 from the Iranian landrace PI 626573. Molecular Breeding, 34(3), 871–881.
2bl	IT	108	119	wsnp_Ex_c4542_8154800	8034967_2bl	Yr5,Yr7 region	Zurn et. Al. (2014). High-density mapping of a resistance gene to Ug99 from the Iranian landrace PI 626573. Molecular Breeding, 34(3), 871–881.
2bl	IT	108	119	wsnp_Ex_c9628_15927045	8042869_2bl	Yr5,Yr7 region	Zurn et. Al. (2014). High-density mapping of a resistance gene to Ug99 from the Iranian landrace PI 626573. Molecular Breeding, 34(3), 871–881.
2bl	IT	108	119	wsnp_Ex_c10796_17575074	7945759_2bl	Yr5,Yr7 region	Zurn et. Al. (2014). High-density mapping of a resistance gene to Ug99 from the Iranian landrace PI 626573. Molecular Breeding, 34(3), 871–881.
2bl	IT	108	119	wsnp_Ex_rep_c102385_87568304	7982795_2bl	Yr5,Yr7 region	Zurn et. Al. (2014). High-density mapping of a resistance gene to Ug99 from the Iranian landrace PI 626573. Molecular Breeding, 34(3), 871–881.
2bl	IT	108	119	wsnp_Ex_c922_1775246	7982795_2bl	Yr5,Yr7 region	Zurn et. Al. (2014). High-density mapping of a resistance gene to Ug99 from the Iranian landrace PI 626573. Molecular Breeding, 34(3), 871–881.
2bl	IT	108	119	wsnp_JD_c6010_7167159	3570164_2bl	Yr5,Yr7 region	Zurn et. Al. (2014). High-density mapping of a resistance gene to Ug99 from the Iranian landrace PI 626573. Molecular Breeding, 34(3), 871–881.
2bl	IT	108	119	wsnp_RFL_Contig2123_1397739	7968403_2bl	Yr5,Yr7 region	Zurn et. Al. (2014). High-density mapping of a resistance gene to Ug99 from the Iranian landrace PI 626573. Molecular Breeding, 34(3), 871–881.
2bl	IT	108	119	wsnp_Ex_c1915_3618286	8045411_2bl	Yr5,Yr7 region	Zurn et. Al. (2014). High-density mapping of a resistance gene to Ug99 from the Iranian landrace PI 626573. Molecular Breeding, 34(3), 871–881.
2bl	IT	108	119	wsnp_Ex_c22271_31463382	695238_2bl	Yr5,Yr7 region	Zurn et. Al. (2014). High-density mapping of a resistance gene to Ug99 from the Iranian landrace PI 626573. Molecular Breeding, 34(3), 871–881.
2bl	IT	108	119	wsnp_Ex_c942_1806632	7984085_2bl	Yr5,Yr7 region	Zurn et. Al. (2014). High-density mapping of a resistance gene to Ug99 from the Iranian landrace PI 626573. Molecular Breeding, 34(3), 871–881.
2bl	IT	108	119	wsnp_Ex_c11748_18884081	8055663_2bl	Yr5,Yr7 region	Zurn et. Al. (2014). High-density mapping of a resistance gene to Ug99 from the Iranian landrace PI 626573. Molecular Breeding, 34(3), 871–881.
2bl	IT	108	119	wsnp_Ex_c2203_4130096	8053748_2bl	Yr5,Yr7 region	Zurn et. Al. (2014). High-density mapping of a resistance gene to Ug99 from the Iranian landrace PI 626573. Molecular Breeding, 34(3), 871–881.
2bl	IT	108	119	wsnp_Ex_c2203_4129271	8053748_2bl	Yr5,Yr7 region	Zurn et. Al. (2014). High-density mapping of a resistance gene to Ug99 from the Iranian landrace PI 626573. Molecular Breeding, 34(3), 871–881.
2bl	IT	108	119	wsnp_Ex_c2819_5213149	8059111_2bl	Yr5,Yr7 region	Zurn et. Al. (2014). High-density mapping of a resistance gene to Ug99 from the Iranian landrace PI 626573. Molecular Breeding, 34(3), 871–881.
2bl	IT	108	119	wsnp_Ra_c31353_40494768	7996794_2bl	Yr43, Yr44, Yr53 region	Daetwyler et al. (2014). Genomic prediction for rust resistance in diverse wheat landraces. TAG. Theoretical and Applied Genetics. 127(8), 1795–1803	Basnet et al. 2014. Molecular mapping of stripe rust resistance in hard red winter wheat TAM 111 adapted to the U.S. High Plains. Crop Sci. 54:1361–1373
2bl	IT	108	119	wsnp_Ku_c15498_24122936	8002985_2bl	Yr43, Yr44, Yr53 region	Daetwyler et al. (2014). Genomic prediction for rust resistance in diverse wheat landraces. TAG. Theoretical and Applied Genetics. 127(8), 1795–1803.	Basnet et al. 2014. Molecular mapping of stripe rust resistance in hard red winter wheat TAM 111 adapted to the U.S. High Plains. Crop Sci. 54:1361–1373
2bl	IT	108	119	wsnp_Ex_c24135_33382700	8002985_2bl	Yr43, Yr44, Yr53 region	Daetwyler et al. (2014). Genomic prediction for rust resistance in diverse wheat landraces. TAG. Theoretical and Applied Genetics. 127(8), 1795–1803.	Basnet et al. 2014. Molecular mapping of stripe rust resistance in hard red winter wheat TAM 111 adapted to the U.S. High Plains. Crop Sci. 54:1361–1373
5al	IT	53	86	wsnp_Ku_c12211_19780409	2749793_5al		Daetwyler et al. (2014). Genomic prediction for rust resistance in diverse wheat landraces. TAG. Theoretical and Applied Genetics. 127(8), 1795–1803.
5al	IT	53	86	wsnp_Ku_c35386_44598937	2739451_5al		Zegeye et al. (2014). Genome-wide association mapping for seedling and adult plant resistance to stripe rust in synthetic hexaploid wheat. PloS One, 9(8), e105593.
6bl	IT	64	68	wsnp_Ex_c38198_45786860	2951229_6bs		Daetwyler et al. (2014). Genomic prediction for rust resistance in diverse wheat landraces. TAG. Theoretical and Applied Genetics. 127(8), 1795–1803.
6bs	IT	55	60	wsnp_Ex_c45081_50974769	3042510_6bs		Daetwyler et al. (2014). Genomic prediction for rust resistance in diverse wheat landraces. TAG. Theoretical and Applied Genetics. 127(8), 1795–1803.
6bs	IT	55	60	wsnp_Ex_c25505_34771897	3026634_6bs		Daetwyler et al. (2014). Genomic prediction for rust resistance in diverse wheat landraces. TAG. Theoretical and Applied Genetics. 127(8), 1795–1803.
7al	IT	127	136	wsnp_JD_c15333_14824351	4490489_7al		Daetwyler et al. (2014). Genomic prediction for rust resistance in diverse wheat landraces. TAG. Theoretical and Applied Genetics. 127(8), 1795–1803.
7al	IT	127	136	wsnp_Ex_c9982_16429661	4559704_7al		Zegeye et al. (2014). Genome-wide association mapping for seedling and adult plant resistance to stripe rust in synthetic hexaploid wheat. PloS One, 9(8), e105593.
7bl	IT	75	79	wsnp_RFL_Contig3405_3533915	6742434_7bl		Zegeye et al. (2014). Genome-wide association mapping for seedling and adult plant resistance to stripe rust in synthetic hexaploid wheat. PloS One, 9(8), e105593.
7bl	IT	102	108	wsnp_BG262287B_Td_2_5	6744585_7bl	Yr39, Yr52 region	Daetwyler et al. (2014). Genomic prediction for rust resistance in diverse wheat landraces. TAG. Theoretical and Applied Genetics. 127(8), 1795–1803.
3b	SD	75	78	wsnp_Ex_c29623_38630871	10570435_3b		Zegeye et al. (2014). Genome-wide association mapping for seedling and adult plant resistance to stripe rust in synthetic hexaploid wheat. PloS One, 9(8), e105593.
3b	SD	75	78	wsnp_Ex_c4267_7700267	10756975_3b		Zegeye et al. (2014). Genome-wide association mapping for seedling and adult plant resistance to stripe rust in synthetic hexaploid wheat. PloS One, 9(8), e105593.
3b	SD	75	78	wsnp_Ex_c4267_7700325	10756975_3b		Zegeye et al. (2014). Genome-wide association mapping for seedling and adult plant resistance to stripe rust in synthetic hexaploid wheat. PloS One, 9(8), e105593.
3b	SD	75	78	wsnp_Ex_c4267_7700461	10756975_3b		Zegeye et al. (2014). Genome-wide association mapping for seedling and adult plant resistance to stripe rust in synthetic hexaploid wheat. PloS One, 9(8), e105593.
